# Supplementary material for: Relevance of selective neural stimulation with a multicontact cuff electrode using multicriteria analysis
Source: PubMed Central journal article supplement (PMC6605667; doi:10.1371/journal.pone.0219079), 2019-07-02
Supplement: pone.0219079.s001.pdf [file pone.0219079.s001.pdf]

**S1 Table**

| Muscle | Configuration (Conformation) | SI   | Rob  | Eff  | Recruitment | Intensity ( $\mu\text{A}$ ) $\pm$ step |
|--------|------------------------------|------|------|------|-------------|----------------------------------------|
| TA     | TTR (B4)                     | 0.91 | 0.73 | 0.5  | 80.4%       | 600 ( $\pm$ 150)                       |
|        | TLR (B4)                     | 0.64 | 0.49 | 0.67 | 66.5%       | 300 ( $\pm$ 75)                        |
|        | TL (B4)                      | 0.64 | 0.74 | 0.67 | 62.7%       | 300 ( $\pm$ 75)                        |
|        | SCR (B4)                     | 0.94 | 0.37 | 0.5  | 70.3%       | 600 ( $\pm$ 150)                       |
|        | TT (B4)                      | 0.57 | 0.74 | 0.31 | 58.4%       | 1350 ( $\pm$ 450)                      |
| LG     | TTR (B2)                     | 0.33 | 0.72 | 0.5  | 79.1%       | 300 ( $\pm$ 75)                        |
|        | TLR (B1)                     | 0.36 | 0.89 | 0.62 | 54.6%       | 187.5 ( $\pm$ 37.5)                    |
|        | TL (B1)                      | 0.35 | 0.87 | 0.62 | 47.7%       | 187.5 ( $\pm$ 37.5)                    |
|        | SCR (B2)                     | 0.35 | 0.87 | 0.4  | 33.4%       | 450 ( $\pm$ 150)                       |
|        | TT (B1)                      | 0.37 | 0.85 | 0.44 | 40.9%       | 375 ( $\pm$ 75)                        |
| Sol    | TTR (B1)                     | 0.37 | 0.95 | 0.62 | 97.4%       | 600 ( $\pm$ 150)                       |
|        | TLR (B1)                     | 0.39 | 0.75 | 0.76 | 79.2%       | 300 ( $\pm$ 75)                        |
|        | TL (B1)                      | 0.35 | 0.83 | 0.81 | 63.1%       | 225 ( $\pm$ 75)                        |
|        | SCR (B1)                     | 0.36 | 0.81 | 0.72 | 69.8%       | 375 ( $\pm$ 75)                        |
|        | TT (B1)                      | 0.33 | 0.98 | 0.48 | 63.8%       | 1050 ( $\pm$ 300)                      |
| MG     | TTR (B2)                     | 0.37 | 0.86 | 0.2  | 73.1%       | 600 ( $\pm$ 150)                       |
|        | TLR (B3)                     | 0.81 | 0.53 | 0.44 | 22.9%       | 187.5 ( $\pm$ 37.5)                    |
|        | TL (B2)                      | 0.72 | 0.66 | 0.57 | 37.0%       | 112.5 ( $\pm$ 37.5)                    |
|        | SCR (B2)                     | 0.72 | 0.68 | 0.5  | 23.5%       | 150 ( $\pm$ 37.5)                      |
|        | TT (B2)                      | 0.77 | 0.96 | 0.1  | 34.5%       | 1350 ( $\pm$ 450)                      |
