# Supplementary material for: Relevance of selective neural stimulation with a multicontact cuff electrode using multicriteria analysis
Source: PubMed Central journal article supplement (PMC6605667; doi:10.1371/journal.pone.0219079), 2019-07-02
Supplement: pone.0219079.s002.pdf [file pone.0219079.s002.pdf]

**S2 Table**

| Muscle | Configuration (Conformation) | SI   | Rob  | Eff  | Recruitment | Intensity ( $\mu\text{A}$ ) $\pm$ step |
|--------|------------------------------|------|------|------|-------------|----------------------------------------|
| TA     | TTR (B1)                     | 0.95 | 0.52 | 0.55 | 27.2%       | 375 ( $\pm 75$ )                       |
|        | TLR (B2)                     | 0.81 | 0.43 | 0.55 | 27.4%       | 375 ( $\pm 75$ )                       |
|        | TL (B1)                      | 0.9  | 0.47 | 0.6  | 29.8%       | 300 ( $\pm 75$ )                       |
|        | SCR (B1)                     | 0.78 | 0.67 | 0.43 | 44.6%       | 600 ( $\pm 75$ )                       |
|        | TT (B1)                      | 0.76 | 0.95 | 0.29 | 22.8%       | 1125 ( $\pm 375$ )                     |
| LG     | TTR (B4)                     | 0.35 | 0.83 | 0.5  | 96.7%       | 600 ( $\pm 75$ )                       |
|        | TLR (B1)                     | 0.34 | 0.86 | 0.47 | 88.3%       | 675 ( $\pm 75$ )                       |
|        | TL (B2)                      | 0.38 | 0.83 | 0.47 | 78.1%       | 675 ( $\pm 75$ )                       |
|        | SCR (B2)                     | 0.36 | 0.82 | 0.5  | 92.2%       | 600 ( $\pm 75$ )                       |
|        | TT (B4)                      | 0.37 | 0.78 | 0.36 | 96.2%       | 1050 ( $\pm 150$ )                     |
| Sol    | TTR (B4)                     | 0.29 | 0.88 | 0.52 | 76.6%       | 750 ( $\pm 75$ )                       |
|        | TLR (B4)                     | 0.3  | 0.89 | 0.52 | 84.7%       | 750 ( $\pm 75$ )                       |
|        | TL (B4)                      | 0.33 | 0.83 | 0.5  | 88.0%       | 825 ( $\pm 75$ )                       |
|        | SCR (B4)                     | 0.31 | 0.9  | 0.52 | 82.1%       | 750 ( $\pm 75$ )                       |
|        | TT (B4)                      | 0.34 | 0.88 | 0.48 | 72.1%       | 900 ( $\pm 150$ )                      |
| MG     | TTR (B4)                     | 0.94 | 0.6  | 0.45 | 57.3%       | 450 ( $\pm 75$ )                       |
|        | TLR (B4)                     | 0.86 | 0.32 | 0.63 | 56.7%       | 225 ( $\pm 75$ )                       |
|        | TL (B3)                      | 0.88 | 0.42 | 0.42 | 49.6%       | 525 ( $\pm 75$ )                       |
|        | SCR (B4)                     | 0.85 | 0.46 | 0.56 | 53.1%       | 300 ( $\pm 75$ )                       |
|        | TT (B4)                      | 0.82 | 0.59 | 0.5  | 48.1%       | 375 ( $\pm 75$ )                       |
