# Supplementary material for: Relevance of selective neural stimulation with a multicontact cuff electrode using multicriteria analysis
Source: PubMed Central journal article supplement (PMC6605667; doi:10.1371/journal.pone.0219079), 2019-07-02
Supplement: pone.0219079.s003.pdf [file pone.0219079.s003.pdf]

**S3 Table**

| Muscle | Configuration (Conformation) | SI   | Rob  | Eff  | Recruitment | Intensity ( $\mu$ A) $\pm$ step |
|--------|------------------------------|------|------|------|-------------|---------------------------------|
| TA     | TTR (B4)                     | 0.7  | 0.73 | 0.44 | 63.1%       | 375 ( $\pm$ 75)                 |
|        | TLR (B4)                     | 0.76 | 0.41 | 0.62 | 86.9%       | 187.5 ( $\pm$ 37.5)             |
|        | TL (B4)                      | 0.69 | 0.51 | 0.62 | 65.8%       | 187.5 ( $\pm$ 37.5)             |
|        | SCR (B4)                     | 0.71 | 0.63 | 0.62 | 73.1%       | 187.5 ( $\pm$ 37.5)             |
|        | TT (B4)                      | 0.7  | 0.98 | 0.2  | 92.3%       | 1200 ( $\pm$ 300)               |
| LG     | TTR (B1)                     | 0.36 | 0.87 | 0.56 | 81.2%       | 600 ( $\pm$ 150)                |
|        | TLR (B1)                     | 0.28 | 0.9  | 0.56 | 92.7%       | 600 ( $\pm$ 150)                |
|        | TL (B2)                      | 0.28 | 0.9  | 0.67 | 70.1%       | 375 ( $\pm$ 75)                 |
|        | SCR (B2)                     | 0.33 | 0.84 | 0.5  | 74.5%       | 750 ( $\pm$ 200)                |
|        | TT                           | NAN  | NAN  | NAN  | NAN         | NAN                             |
| Sol    | TTR (B3)                     | 0.83 | 0.99 | 0.14 | 24.3%       | 225 ( $\pm$ 75)                 |
|        | TLR (B3)                     | 0.92 | 0.88 | 0.25 | 27.4%       | 112.5 ( $\pm$ 37.5)             |
|        | TL (B3)                      | 0.86 | 0.99 | 0.25 | 28.8%       | 112.5 ( $\pm$ 37.5)             |
|        | SCR (B1)                     | 0.86 | 0.99 | 0.5  | 29.2%       | 37.5 ( $\pm$ 37.5)              |
|        | TT (B2)                      | 0.89 | 0.97 | 0.03 | 30.6%       | 1050 ( $\pm$ 150)               |
| MG     | TTR (B2)                     | 0.83 | 0.31 | 0.4  | 79.9%       | 450 ( $\pm$ 150)                |
|        | TLR (B2)                     | 0.78 | 0.35 | 0.57 | 79.8%       | 225 ( $\pm$ 75)                 |
|        | TL (B2)                      | 0.74 | 0.4  | 0.5  | 84.6%       | 300 ( $\pm$ 75)                 |
|        | SCR (B2)                     | 0.77 | 0.4  | 0.33 | 75.2%       | 600 ( $\pm$ 150)                |
|        | TT (B2)                      | 0.51 | 0.75 | 0.14 | 35.9%       | 1800 ( $\pm$ 300)               |
